# Supplementary material for: The Modulation of Phase II Drug-Metabolizing Enzymes in Proliferating and Differentiated CaCo-2 Cells by Hop-Derived Prenylflavonoids
Source: Nutrients. 2020 Jul 18;12(7):2138. doi: 10.3390/nu12072138 (PMC7400824; doi:10.3390/nu12072138)
Supplement: Supplementary file 1 [file nutrients-12-02138-s001.pdf]

# Modulation of Phase II Drug-Metabolizing Enzymes in proliferating and differentiated CaCo-2 Cells by Hop-Derived Prenylflavonoids

Kateřina Lněničková <sup>1</sup>, Michaela Šadibolová <sup>2</sup>, Petra Matoušková <sup>2</sup>, Barbora Szotáková <sup>2</sup>, Lenka Skálová <sup>2</sup> and Iva Boušová <sup>2,\*</sup>

<sup>1</sup> Faculty of Medicine and Dentistry, Palacký University, Hněvotínská 3, 775 15 Olomouc, Czech Republic; [katerina.lnenickova@upol.cz](mailto:katerina.lnenickova@upol.cz) (K.L.)

<sup>2</sup> Faculty of Pharmacy in Hradec Králové, Charles University, Heyrovského 1203, 500 05, Hradec Králové, Czech Republic; [sadibolom@faf.cuni.cz](mailto:sadibolom@faf.cuni.cz) (M.Š.); [matousp7@faf.cuni.cz](mailto:matousp7@faf.cuni.cz) (P.M.); [szotakova@faf.cuni.cz](mailto:szotakova@faf.cuni.cz) (B.S.); [skaloval@faf.cuni.cz](mailto:skaloval@faf.cuni.cz) (L.S.)

\* Correspondence: [Iva.Bousova@faf.cuni.cz](mailto:Iva.Bousova@faf.cuni.cz) (I.B.); Tel.: +420-495-067-406

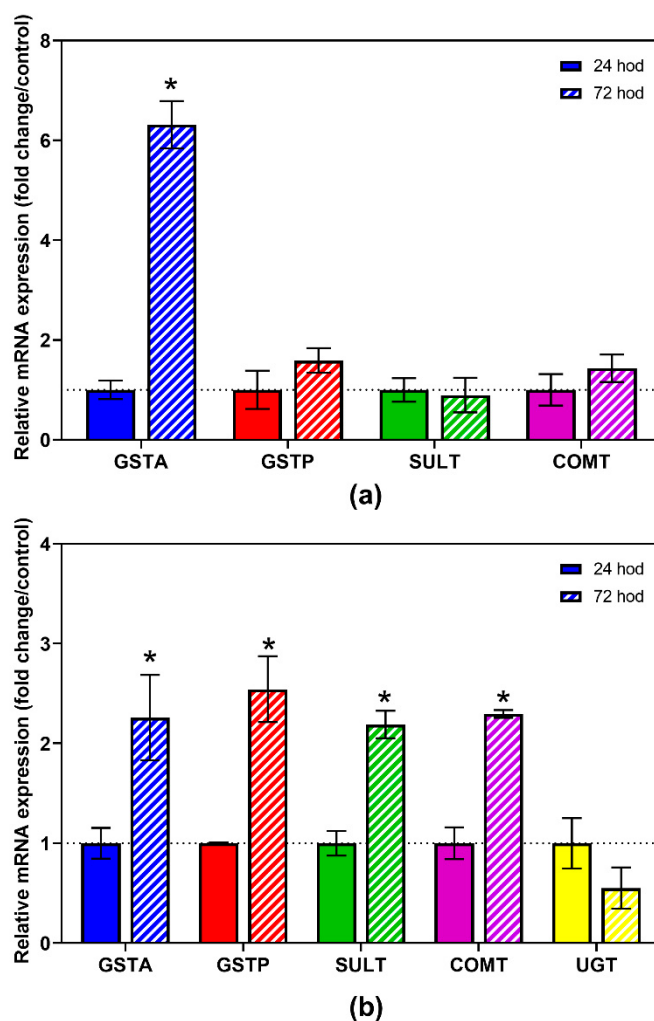

**Figure S1.** mRNA expression of phase II DMEs in proliferating (a) and differentiated (b) CaCo-2 cells after 24 h and 72 h. The normalized expression level was calculated using the  $2^{-\Delta\Delta C_t}$  method with the geometric mean of GAPDH and B2M as a reference gene. Results are presented as the mean  $\pm$  SD of 3 independent experiments. Statistical analyses were performed using Student's t-test with  $p < 0.05$ , \* different from control after 24 h.
